# Supplementary material for: Rapid formation of black titania photoanodes: pulsed laser-induced oxygen release and enhanced solar water splitting efficiency
Source: Royal Society of Chemistry journal article supplement (doi:10.1039/c4ta00557k), 2014-01-01
Supplement: c4ta00557k1.pdf [file c4ta00557k1.pdf]

## Electronic Supplementary Information

# Rapid formation of black titania photoanodes: pulsed laser induced oxygen release and enhanced solar water splitting efficiency

Tomohiko Nakajima,\* Takako Nakamura, Kentaro Shinoda and Tetsuo Tsuchiya

Advanced Manufacturing Research Institute, National Institute of Advanced Industrial Science and Technology, Tsukuba Central 5, 1-1-1 Higashi, Tsukuba, Ibaraki 305-8565, Japan.

## Temperature simulation under pulsed laser irradiation

Temperature variations during laser irradiation can be described by the heat diffusion equation simplified to describe one-dimensional heat flow<sup>1</sup>

$$\rho C \frac{\partial T}{\partial t} = \kappa \frac{\partial^2 T}{\partial z^2} + \alpha I(z, t)$$

where  $T$  is the temperature function at time  $t$  and depth  $z$ ,  $\rho$  is the mass density,  $C$  is the specific heat capacity,  $\alpha$  is the optical absorption coefficient,  $\kappa$  is the thermal conductivity, and  $I(z, t)$  is the laser power density. The laser power  $I(z, t)$  is given by:

$$I(z, t) = I_0(t) \cdot (1 - r) \cdot \exp(-\alpha z)$$

where  $r$  is the reflectance. The contribution from the incremental absorbance of the films caused by reflectance at the substrate surface was also included in the laser power distribution.  $I_0(t)$  is described as a smooth pulse approximated by:

$$I_0(t) = I_0 \cdot \left(\frac{t}{\tau}\right)^\beta \cdot \exp\left(\beta\left(1 - \frac{t}{\tau}\right)\right)$$

where  $I_0$  is the incident pulse power density,  $\tau$  is the pulse duration (KrF: 26 ns), and  $\beta$  determines the temporal pulse shape (KrF: 6.0). We carried out numerical simulations for the temperature variation for the excimer laser irradiation process using a difference approximation based on the above equations. The boundary conditions were  $T = 20$  °C at  $t = 0$  s (initial substrate temperature),  $T = 20$  °C at the bottom of the substrate, and  $\kappa \frac{\partial T}{\partial z} = 0$  at the interfaces (adiabatic conditions). The depth of interface was set as 250 nm (the film thickness). The physical constants used in the calculations are listed in Table 1.

**Table 1** Physical properties used in numerical simulations.<sup>1-4</sup>

| Material         | $\alpha / \text{cm}^{-1}$ | $r$   | $\kappa / \text{Wcm}^{-1}\text{K}^{-1}$ | $\rho / \text{cm}^3$ | $C / \text{Jg}^{-1}\text{K}^{-1}$ |
|------------------|---------------------------|-------|-----------------------------------------|----------------------|-----------------------------------|
| TiO <sub>2</sub> | 1,040,000                 | 0.266 | 0.089                                   | 4.26                 | 0.930                             |
| SnO <sub>2</sub> | 6,800,000                 | 0.010 | 0.98                                    | 6.99                 | 0.372                             |

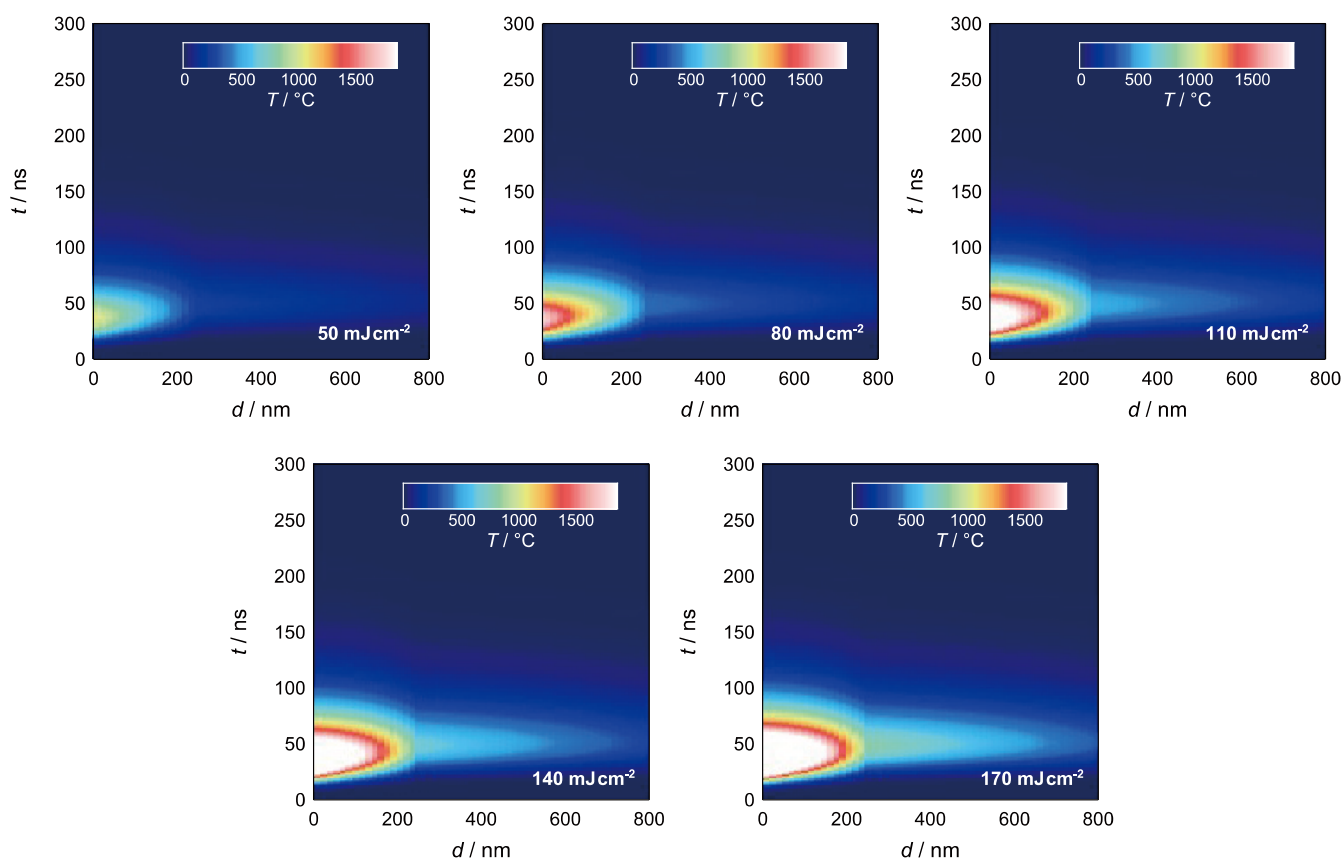

**Figure S1:** Numerical simulations of temperature map for depth ( $d$ ) and time ( $t$ ) of the  $\text{TiO}_2$  thin films on the  $\text{SnO}_2$  layers irradiated by KrF laser at 50, 80, 110, 140 and 170  $\text{mJ}/\text{cm}^2$ . The white region exceeds the melting point of  $\text{TiO}_2$  at 1843 °C

### PEC property of $\text{TiO}_{2-x}$ photoanodes prepared in air

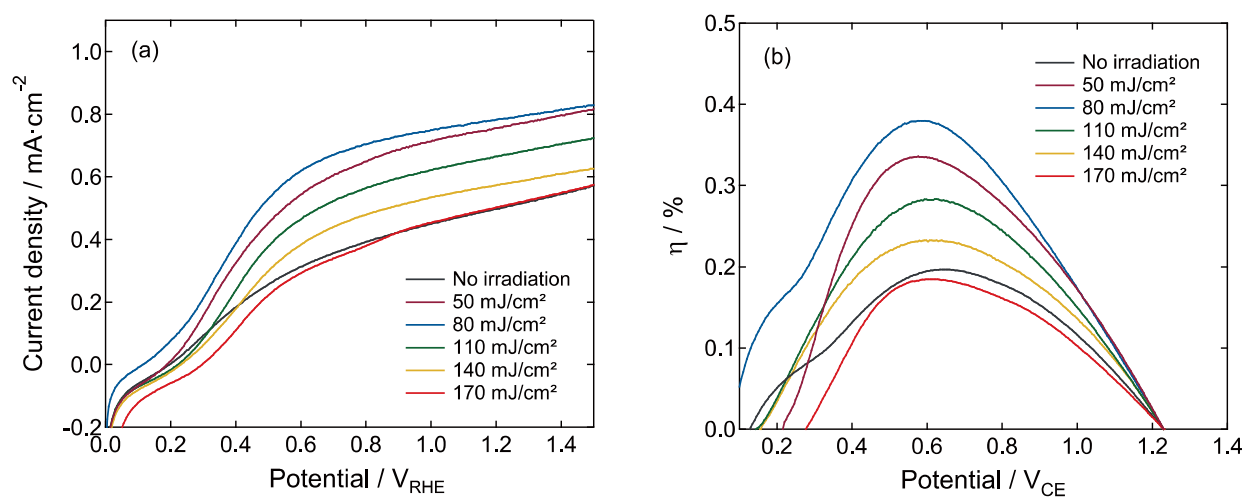

**Figure S2:** (a)  $J$ - $V$  curves and (b)  $\eta$  of the pristine  $\text{TiO}_2$  and laser irradiated  $\text{TiO}_{2-x}$  photoanodes under simulated solar light at  $100 \text{ mW}\cdot\text{cm}^{-2}$  in 1 M KOH electrolyte ( $\text{pH} = 13.6$ ). The laser irradiation was carried out in air. The dark current of all samples was less than  $2 \times 10^{-3} \text{ mA}\cdot\text{cm}^{-2}$ .

## References

- 1 Bauerle, D.: *Laser Processing and Chemistry* (Springer-Verlag Berlin Heidelberg New York 2000)
- 2 P. Turkes *et al.*, *J. Phys. C: Solid State Phys.*, 1980, **13**, 4941.
- 3 Q. Shi *et al.*, *J. Phys. Chem. C*, 2012, **116**, 3910.
- 4 F. Yakuphanoglu, *J. Alloys Compd.*, 2009, **470**, 55.
